# Supplementary material for: Macromolecular Engineering of Poly(catechol) Cathodes towards High-Performance Aqueous Zinc-Polymer Batteries
Source: MDPI journal article supplement (doi:10.3390/polym13111673), 2021-05-21
Supplement: s1 [file s1]

Supplementary Information

# Macromolecular Engineering of Poly(catechol) Cathodes towards High-Performance Aqueous Zinc-Polymer Batteries

Nagaraj Patil \*, Jesus Palma and Rebeca Marcilla \*

Electrochemical Processes Unit, IMDEA Energy Institute, Avda. Ramón de la Sagra 3, 28935 Móstoles, Spain; [jesus.palma@imdea.org](mailto:jesus.palma@imdea.org)

\* Correspondence: [nagaraj.patil@imdea.org](mailto:nagaraj.patil@imdea.org) (N.P.); [rebeca.marcilla@imdea.org](mailto:rebeca.marcilla@imdea.org) (R.M.); Tel.: +34-917371131 (R.M.)

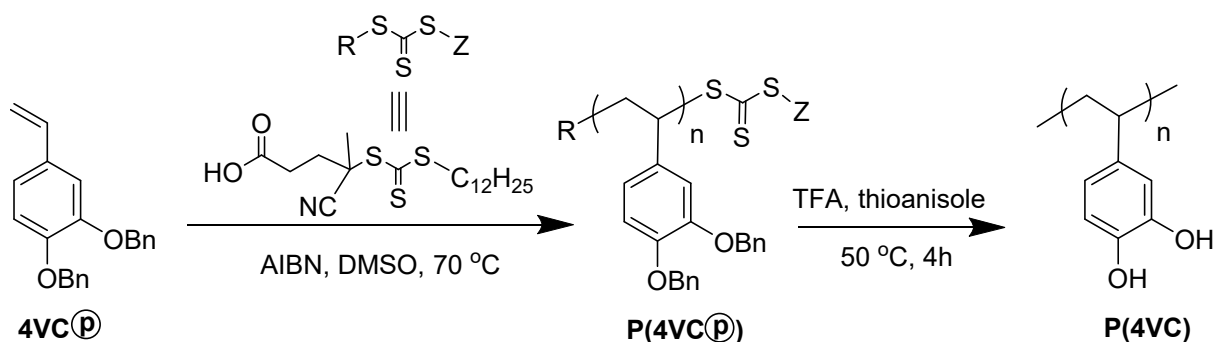

**Scheme S1.** Synthetic scheme of poly(4-vinyl catechol) homopolymer (P(4VC)<sub>100</sub>) by RAFT polymerization.

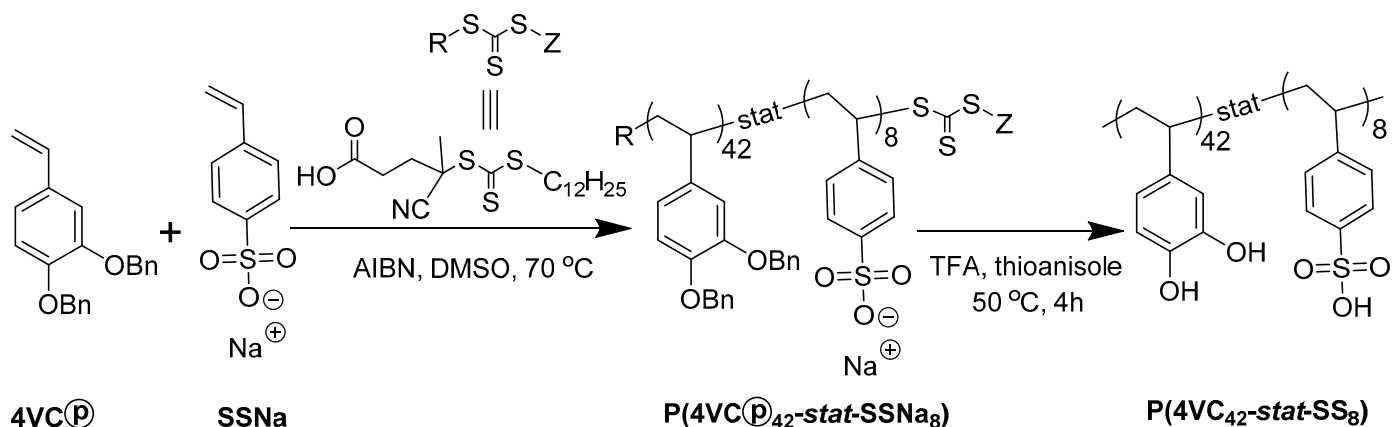

**Scheme S2.** Synthetic scheme of poly(4-vinyl catechol-*stat*-4-styrenesulfonic acid sodium salt) copolymer (P(4VC<sub>86</sub>-*stat*-SS<sub>14</sub>)) by RAFT polymerization.

**Table S1.** An exhaustive list comprising the comparison of Zn||P(4VC)<sub>100</sub> and Zn||P(4VC<sub>86</sub>-stat-SS<sub>14</sub>) cell performances with the state-of-the-art Zn||polymer aqueous batteries.

| Active-material                                                                     | #[ref]    | C <sub>s</sub> , theo;<br>C <sub>s</sub> , initial/max.; capaci-<br>ty utilization ratio<br>(%) | cycle performance:<br>% C <sub>s</sub> , retention;<br>number of cycles;<br>speed (C-rate or cur-<br>rent density) | average dis-<br>charge potential<br>(V, vs Zn/Zn <sup>2+</sup> ) | cell configuration:<br>anode   electrolyte   cathode (ac-<br>tive-material/conducting addi-<br>tive/binder, wt/wt/wt%)                                |
|-------------------------------------------------------------------------------------|-----------|-------------------------------------------------------------------------------------------------|--------------------------------------------------------------------------------------------------------------------|------------------------------------------------------------------|-------------------------------------------------------------------------------------------------------------------------------------------------------|
| 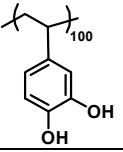   | this work | 400<br>350<br>87.5%                                                                             | n a                                                                                                                | 1.2                                                              | Zn   4 m Zn(TFSI) <sub>2</sub>   P(4VC) <sub>100</sub><br>(P(4VC) <sub>100</sub> / MWCNTs, 60/40)                                                     |
|    | this work | 344<br>324<br>94%                                                                               | 74%<br>400<br>1C                                                                                                   | 1.2                                                              | Zn   4 m Zn(TFSI) <sub>2</sub>  <br>P(4VC <sub>86</sub> -stat-SS <sub>14</sub> )<br>(P(4VC <sub>86</sub> -stat-SS <sub>14</sub> ) / MWCNTs,<br>60/40) |
|    | 1[38]     | 388<br>203<br>52%                                                                               | 86%<br>50<br>0.2C                                                                                                  | 1                                                                | Zn   3M Zn(OTf) <sub>2</sub>   1<br>(1/carbon/PVDF, 60/30/10)                                                                                         |
|   | 2[39]     | n a<br>126<br>n a                                                                               | 96%<br>500<br>0.2 A/g                                                                                              | 0.9                                                              | Zn   3.3M ZnSO <sub>4</sub>   2<br>(2/MWCNT, 38/62)                                                                                                   |
|  | 3[40]     | 500<br>355<br>71%                                                                               | 74.4%<br>3000<br>2C                                                                                                | 0.8                                                              | Zn   3M Zn(OTf) <sub>2</sub>   3+graphene<br>(3+graphene/AB/PVDF, 70/20/10)                                                                           |
|  | 4[41]     | 250<br>228<br>91%                                                                               | 75%<br>500<br>4A/g                                                                                                 | 0.75                                                             | Zn   3M Zn(OTf) <sub>2</sub>   4<br>(4/AB/PVDF, 60/20/20)                                                                                             |
|  | 5[42]     | 133<br>100<br>75%                                                                               | 86%<br>10000<br>10C                                                                                                | 1.1                                                              | Zn   1M Zn(BF <sub>4</sub> ) <sub>2</sub>   5<br>(5/MWCNT, 50/50)                                                                                     |

|  |        |                                                                            |                                        |                  |                                                                                             |
|--|--------|----------------------------------------------------------------------------|----------------------------------------|------------------|---------------------------------------------------------------------------------------------|
|  | 6[43]  | n a<br>306*<br>n a<br>* = protons contribute to majority of charge storage | 73%<br>1100<br>4 mA/cm <sup>2</sup>    | 1.15<br>sloping  | Zn nanoparticles   2M ZnCl <sub>2</sub> + 3M NH <sub>4</sub> Cl   6<br>(electrodeposited 6) |
|  | 7[44]  | 117<br>84<br>72%                                                           | 77%<br>1000<br>1A/g                    | 1.58             | Zn   1M Zn(OTf) <sub>2</sub>   7<br>(7/super P/PVDF, 50/40/10)                              |
|  | 8[45]  | n a<br>91<br>n a                                                           | n a                                    | 0.4              | Zn   2 M ZnSO <sub>4</sub>   8<br>(n a)                                                     |
|  | 9[46]  | n a<br>372<br>n a                                                          | 60%<br>3500<br>1 A/g                   | Sloping<br>(0.9) | Zn   3 M Zn(OTf) <sub>2</sub> PVA   9<br>(n a)                                              |
|  | 10[47] | 442<br>276<br>62%                                                          | 87%<br>1000<br>3.75 A/g                | 0.87             | Zn   3 M ZnSO <sub>4</sub>   10<br>(10/CNF/naion, 76/19/5)                                  |
|  | 11[48] | n a<br>150<br>n a                                                          | 100%<br>10000<br>10 mA/cm <sup>2</sup> | 0.8              | Zn   2 M ZnSO <sub>4</sub>   11<br>(n a)                                                    |
|  | 12[49] | n a<br>151<br>n a                                                          | 100%<br>2000<br>0.2 A/g                | 0.91             | Zn   7.5 m ZnCl <sub>2</sub>   12<br>(12/KB/PTFE, 60/35/5)                                  |
|  | 13[50] | 308<br>260<br>84%                                                          | 79%<br>2000<br>2 A/g                   | 0.7              | Zn   2 M ZnSO <sub>4</sub>   13<br>(13/AB/PVDF, 80/10/10)                                   |

n a = not available. Theoretical capacity ( $C_{s, \text{theo}}$ ) =  $(26801 \times n) / \text{MW}$ ; n = number of electrons involved in the redox process(es), MW = molecular weight of the active-material.  $C_{s, \text{initial/last/max.}}$  = initial / last cycle / maximum specific discharge capacity obtained during cycling performance. All the specific capacities are expressed in mAh g<sup>-1</sup>. Material activity =  $(C_{s, \text{max.}} / C_{s, \text{theo}}) \times 100$ . Capacity retention (%) =  $(C_{s, \text{max. or first cycle}} / C_{s, \text{last cycle}}) \times 100$ . nC-rate designates that the current chosen will charge/discharge the battery in 1/n hour.

Zn-salts: zinc trifluoromethanesulfonate ( $\text{Zn}(\text{OTf})_2$ ), zinc bis(trifluoromethanesulfonyl)imide ( $\text{Zn}(\text{TFSI})_2$ ), zinc sulfate ( $\text{ZnSO}_4$ ), zinc tetrafluoroborate ( $\text{Zn}(\text{BF}_4)_2$ ), zinc chloride ( $\text{ZnCl}_2$ ).

Supplementary salts: ammonium chloride ( $\text{NH}_4\text{Cl}$ ).

Conducting additives: Ketjen black (KB), carbon black (CB), acetylene black (AB), multi-walled carbon nanotubes (MWCNTs).

Binders: poly(vinylidenedifluoride) (PVDF), poly(tetrafluoroethylene) (PTFE).

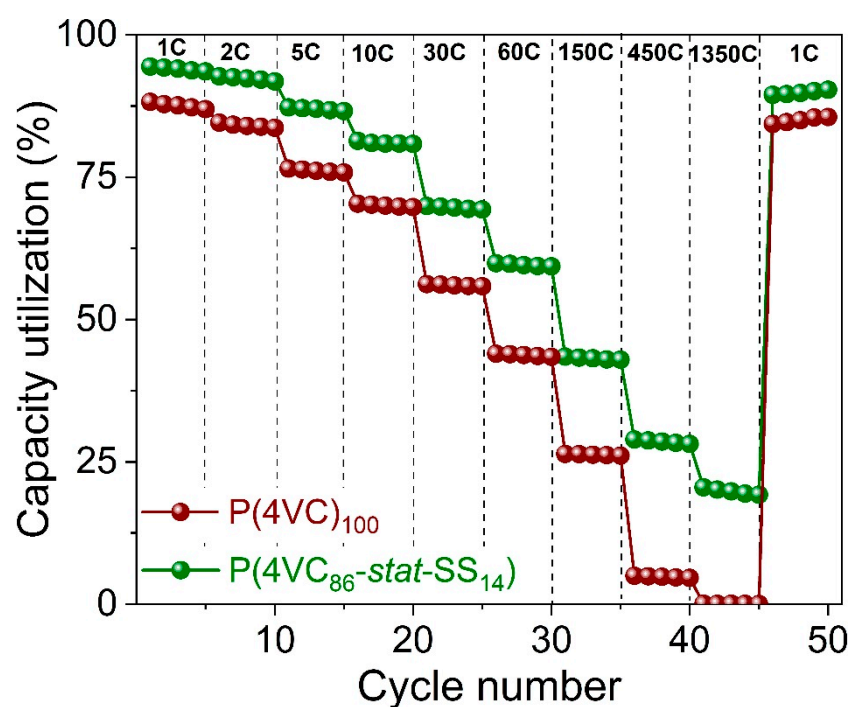

**Figure S1.** Capacity utilization of  $\text{Zn}||\text{P}(\text{4VC})_{100}$  and  $\text{Zn}||\text{P}(\text{4VC}_{86}\text{-stat-SS}_{14})$  cells at various C rates. The capacity utilization values were obtained dividing (practical capacity \* 100) by theoretical capacity. Theoretical specific capacity of  $\text{P}(\text{4VC})_{100}$  and  $\text{P}(\text{4VC}_{86}\text{-stat-SS}_{14})$  are 400 and 344  $\text{mAh g}^{-1}$ , respectively.



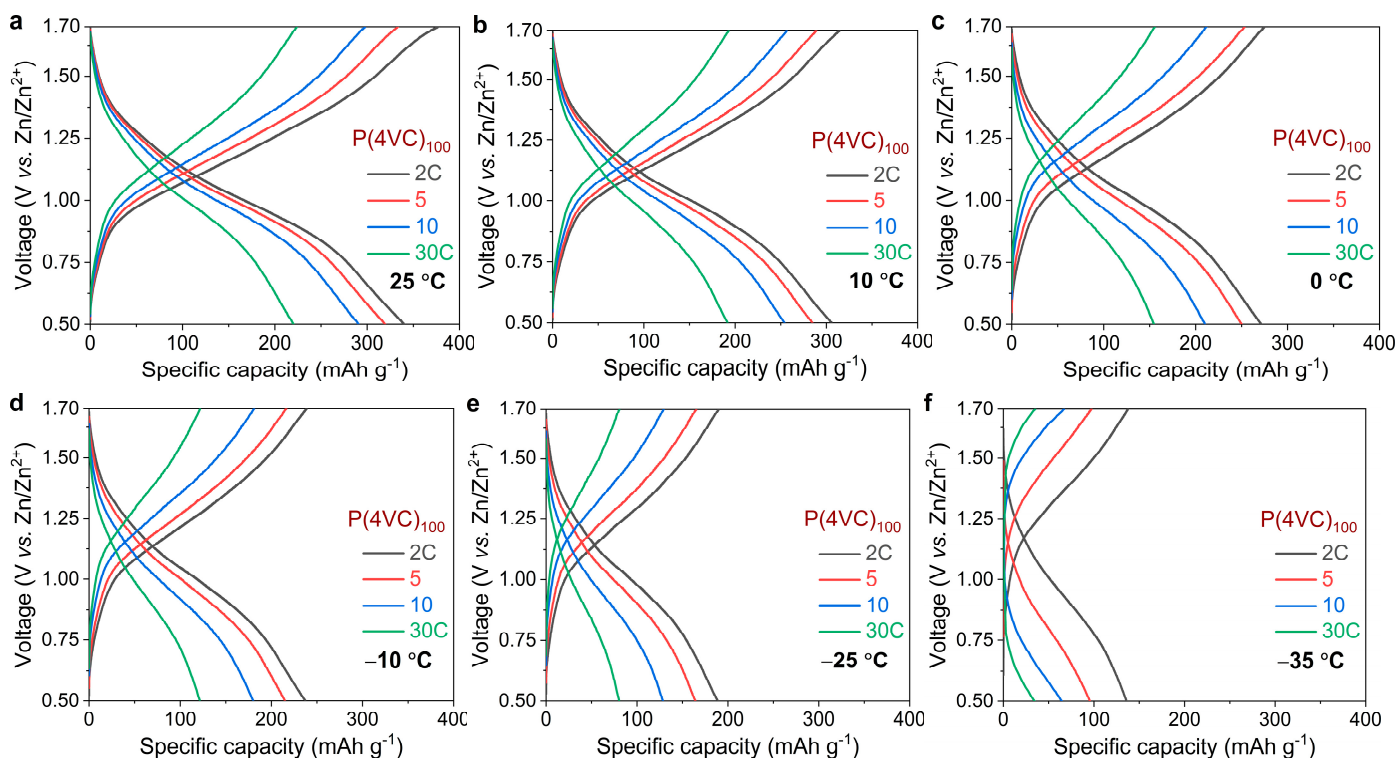

**Figure S2.** Representative specific capacity–voltage profiles of Zn||P(4VC)<sub>100</sub> cells at various C-rates (from 2C to 30C), recorded at +25 (a), +10 (b), 0 (c), –10 (d), –25 (e), and –35 °C (f).

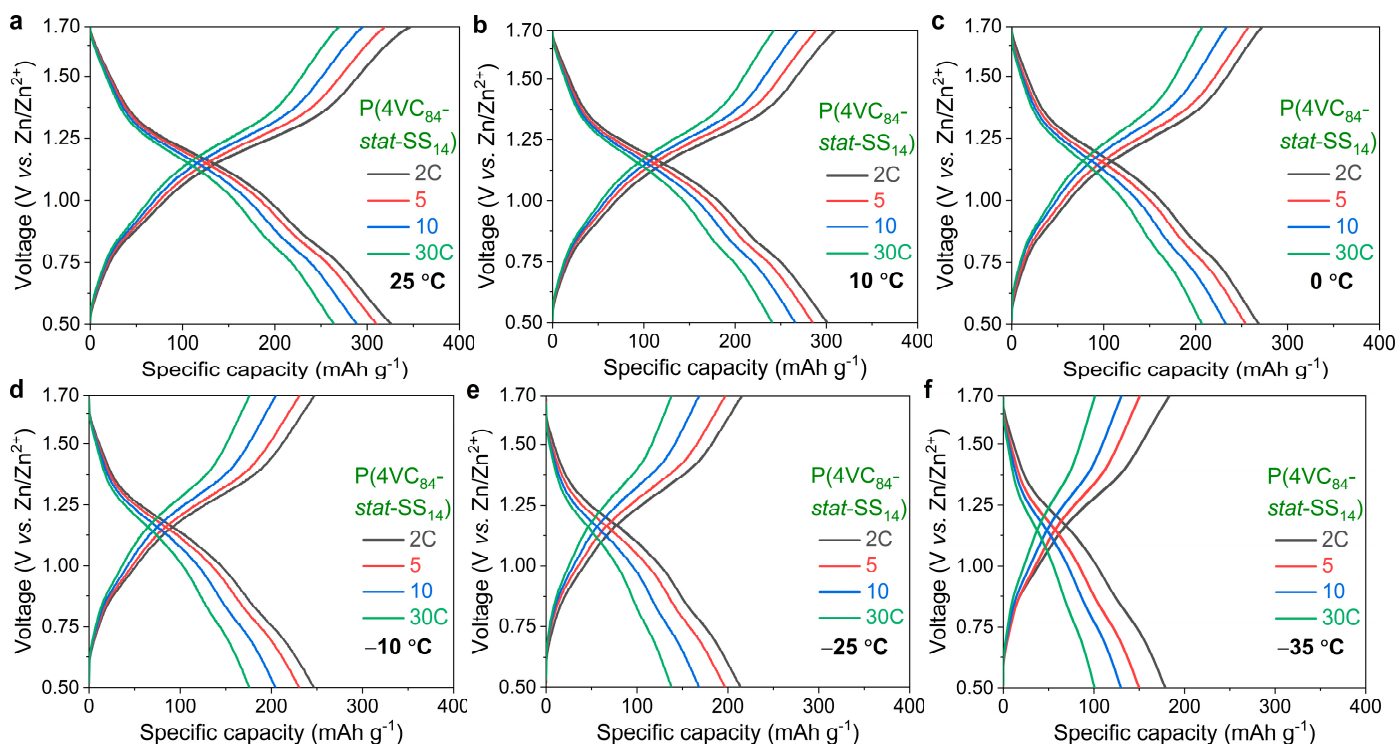

**Figure S3.** Representative specific capacity–voltage profiles of Zn||P(4VC<sub>84</sub>-stat-SS<sub>14</sub>) cells at various C-rates (from 2C to 30C), recorded at +25 (a), +10 (b), 0 (c), –10 (d), –25 (e), and –35 °C (f).

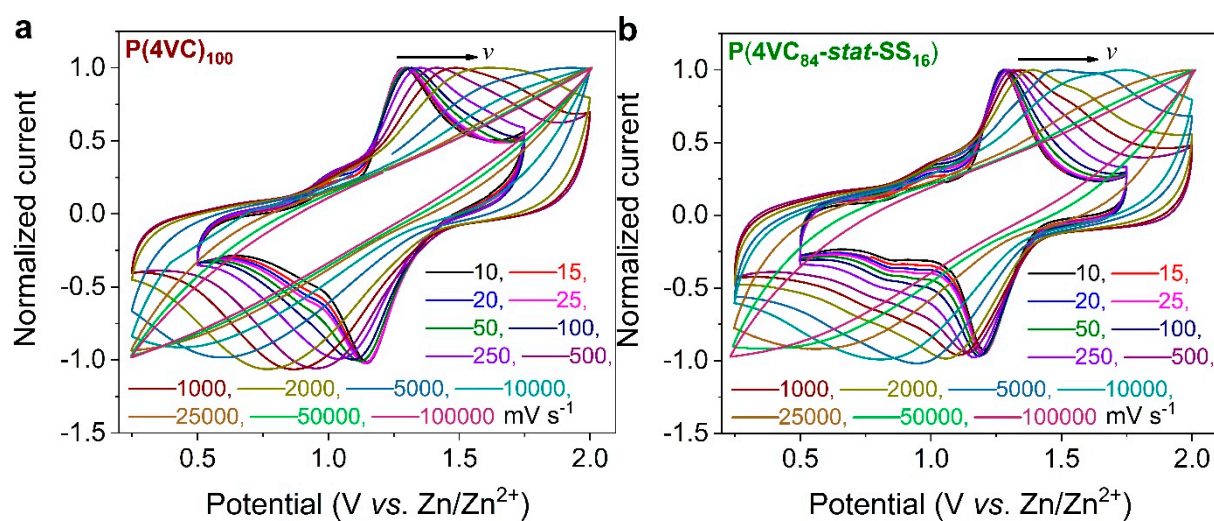

**Figure S4.** Cyclic voltammograms of P(4VC)<sub>100</sub> (a) and P(4VC)<sub>84</sub>-stat-SS<sub>16</sub> (b) composite cathodes at different scan rates. The CVs are normalized by the peak anodic current to show the peak shift with the scan rates. WE = RAP/CNTs deposited on glassy carbon, RE = Zn wire, and CE = Zn foil.

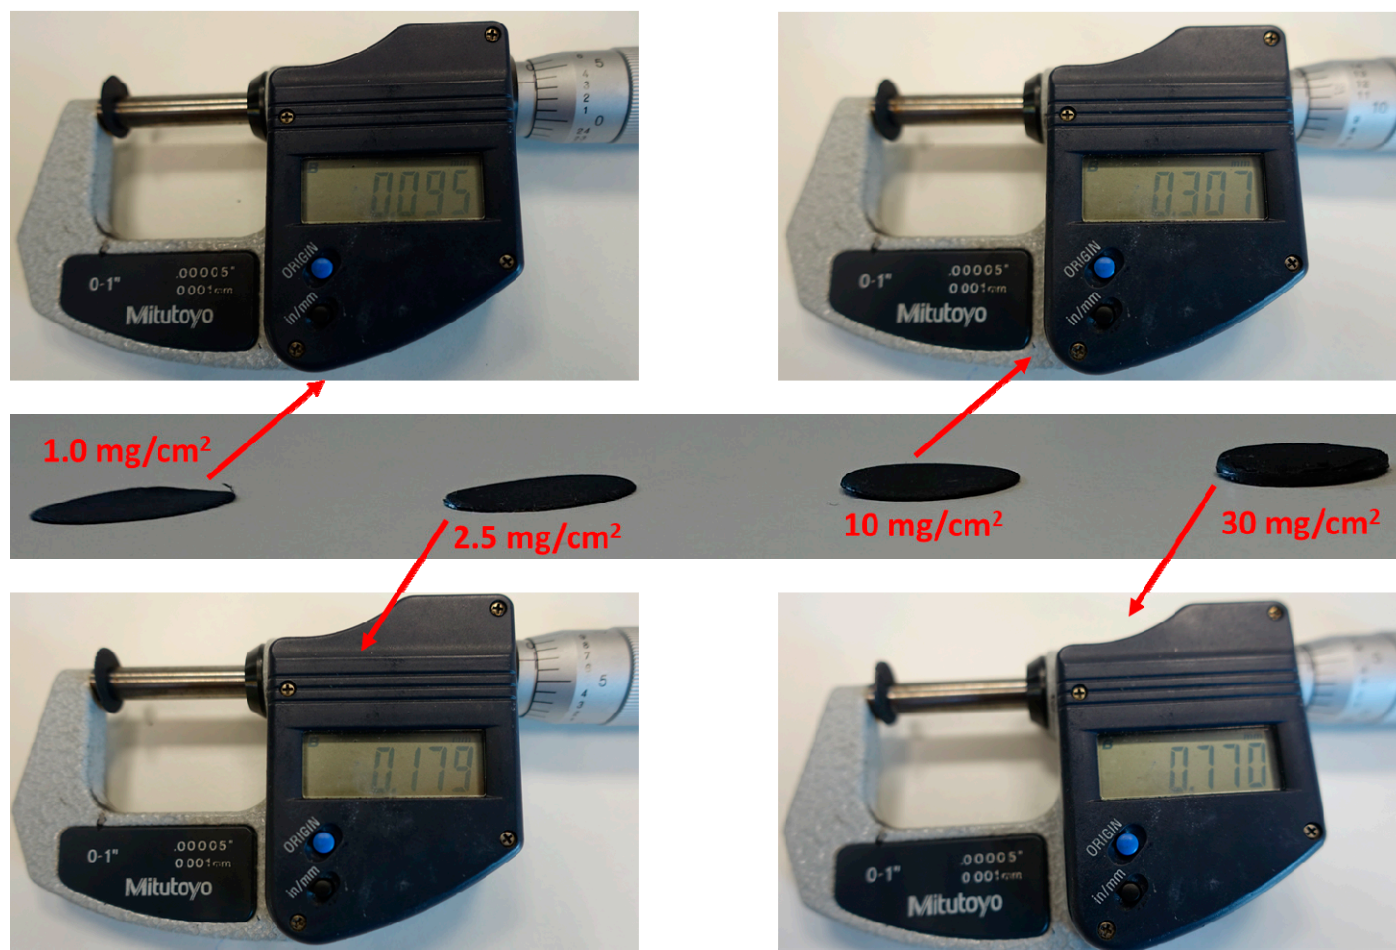

**Figure S5.** Representative digital images of copolymer buckypaper electrodes of different polymer mass loadings, along with their thickness.

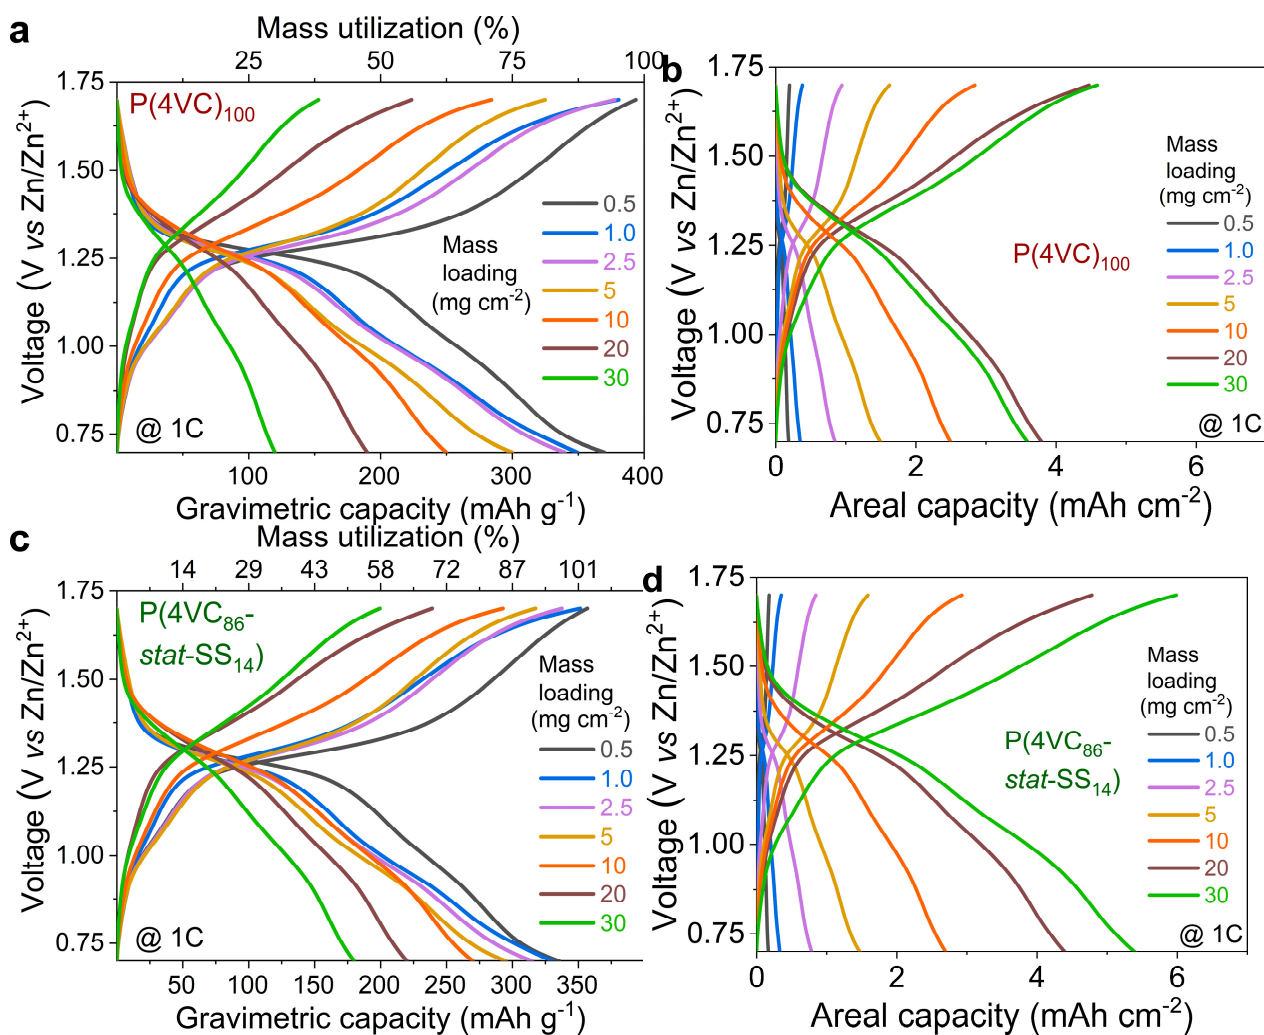

**Figure S6.** Comparing gravimetric capacity, along with mass utilization (based on discharge capacity) (a, c) and areal capacity (b, d) of Zn||P(4VC)<sub>100</sub> (a, b) and Zn||P(4VC)<sub>86</sub>-stat-SS<sub>14</sub> (c, d) cells with different mass loadings.

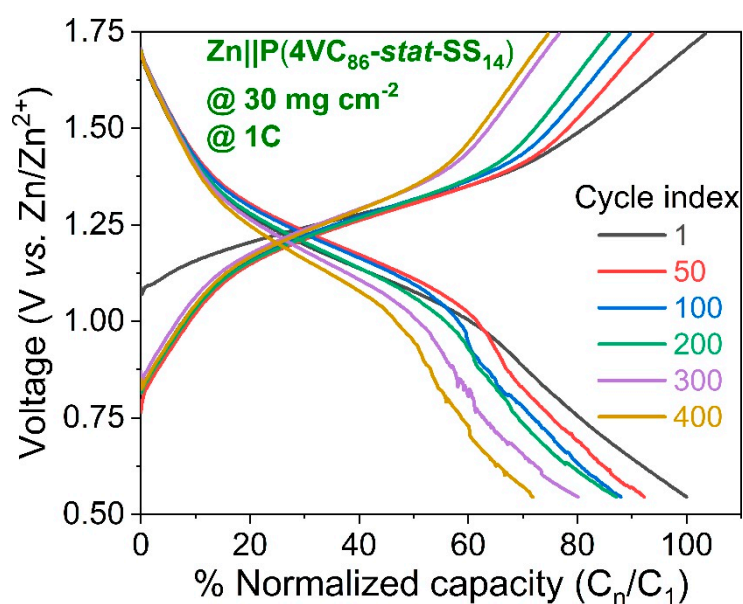

**Figure S7.** Cyclic performance of Zn||P(4VC)<sub>86</sub>-stat-SS<sub>14</sub> at a high mass loading of 30 mg cm<sup>-2</sup>, showing the representative normalized capacity–voltage profiles over 400 GCD cycles at 1C.
